# Supplementary material for: Cubic Octa-Carbon: Quantum-Chemical Design of Molecular Structure and Potential Way of Its Synthesis from Cubane
Source: MDPI journal article supplement (doi:10.3390/ijms222112067), 2021-11-08
Supplement: s1 [file s1]

## Supplementary Materials

### The key geometric paraments of cubane C<sub>8</sub>H<sub>n</sub> molecular structure

| Bond lengths, pm                        |        |            |        |
|-----------------------------------------|--------|------------|--------|
| (C1C2)                                  | 156.1  | (C4C8)     | 156.1  |
| (C1C4)                                  | 156.1  | (C4H4)     | 108.7  |
| (C1C6)                                  | 156.1  | (C5C6)     | 156.1  |
| (C1H1)                                  | 108.7  | (C5C7)     | 156.1  |
| (C2C3)                                  | 156.1  | (C5H7)     | 108.7  |
| (C2C5)                                  | 156.1  | (C6C8)     | 156.1  |
| (C2H2)                                  | 108.7  | (C6H8)     | 108.7  |
| (C3C4)                                  | 156.1  | (C7C8)     | 156.1  |
| (C3C7)                                  | 156.1  | (C7H6)     | 108.7  |
| (C3H3)                                  | 108.7  | (C8H5)     | 108.7  |
| Bond angles, deg                        |        |            |        |
| (C2C1C4)                                | 90.0   | (C2C5C6)   | 90.0   |
| (C2C1C6)                                | 90.0   | (C2C5C7)   | 90.0   |
| (C2C1H1)                                | 125.3  | (C2C5H7)   | 125.3  |
| (C4C1C6)                                | 90.0   | (C6C5C7)   | 90.0   |
| (C4C1H1)                                | 125.3  | (C6C5H7)   | 125.3  |
| (C6C1H1)                                | 125.3  | (C7C5H7)   | 125.3  |
| (C1C2C3)                                | 90.0   | (C1C6C5)   | 90.0   |
| (C1C2C5)                                | 90.0   | (C1C6C8)   | 90.0   |
| (C1C2H2)                                | 125.3  | (C1C6H8)   | 125.3  |
| (C3C2C5)                                | 90.0   | (C5C6C8)   | 90.0   |
| (C3C2H2)                                | 125.3  | (C5C6H8)   | 125.3  |
| (C5C2H2)                                | 125.3  | (C8C6H8)   | 125.3  |
| (C2C3C4)                                | 90.0   | (C3C7C5)   | 90.0   |
| (C2C3C7)                                | 90.0   | (C3C7C8)   | 90.0   |
| (C2C3H3)                                | 125.3  | (C3C7H6)   | 125.3  |
| (C4C3C7)                                | 90.0   | (C5C7C8)   | 90.0   |
| (C4C3H3)                                | 125.3  | (C5C7H6)   | 125.3  |
| (C7C3H3)                                | 125.3  | (C8C7H6)   | 125.3  |
| (C1C4C3)                                | 90.0   | (C4C8C6)   | 90.0   |
| (C1C4C8)                                | 90.0   | (C4C8C7)   | 90.0   |
| (C1C4C12)                               | 125.3  | (C4C8H5)   | 125.3  |
| (C3C4C8)                                | 90.0   | (C6C8C7)   | 90.0   |
| (C3C4H4)                                | 125.3  | (C6C8H5)   | 125.3  |
| (C8C4H4)                                | 125.3  | (C7C8H5)   | 125.3  |
| Selected torsion (dihedral) angles, deg |        |            |        |
| (C4C1C2C3)                              | 0.0    | (C2C3C7C5) | 0.0    |
| (C4C1C2C5)                              | -90.0  | (C2C3C7C8) | 90.0   |
| (C4C1C2H2)                              | 135.0  | (C2C3C7H6) | -135.0 |
| (C6C1C2C3)                              | 90.0   | (C4C3C7C5) | -90.0  |
| (C6C1C2C5)                              | 0.0    | (C4C3C7C8) | 0.0    |
| (C6C1C2H2)                              | -135.0 | (C4C3C7H6) | 135.0  |
| (H1C1C2C3)                              | -135.0 | (H3C3C7C5) | 135.0  |
| (H1C1C2C5)                              | 135.0  | (H3C3C7C8) | -135.0 |
| (H1C1C2H2)                              | 0.0    | (H3C3C7H6) | 0.0    |
| (C2C1C4C3)                              | 0.0    | (C1C4C8C6) | 0.0    |
| (C2C1C4C8)                              | 90.0   | (C1C4C8C7) | -90.0  |
| (C2C1C4H4)                              | -135.0 | (C1C4C8H5) | 135.0  |
| (C6C1C4C3)                              | -90.0  | (C3C4C8C6) | 90.0   |
| (C6C1C4C8)                              | 0.0    | (C3C4C8C7) | 0.0    |

The images of intermediate  $C_8H_n$  ( $n = 8, 6, 4, 2$ ) molecular structures of the cubane dehydrogenation reaction

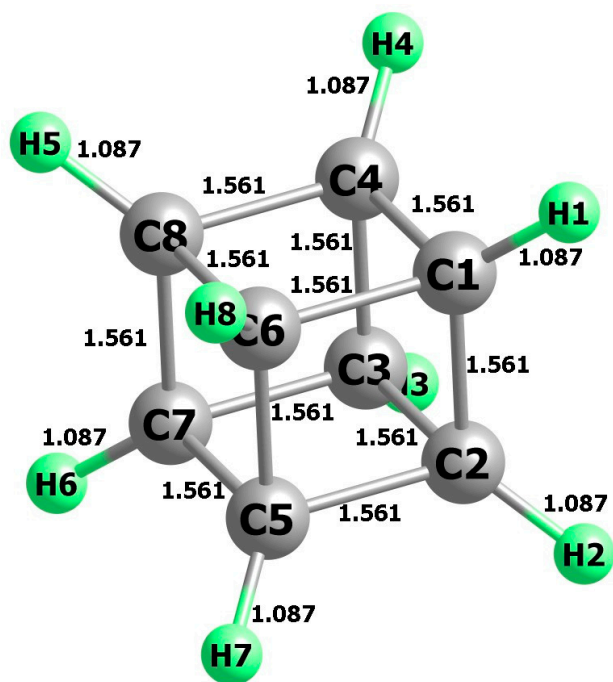

$C_8H_8$

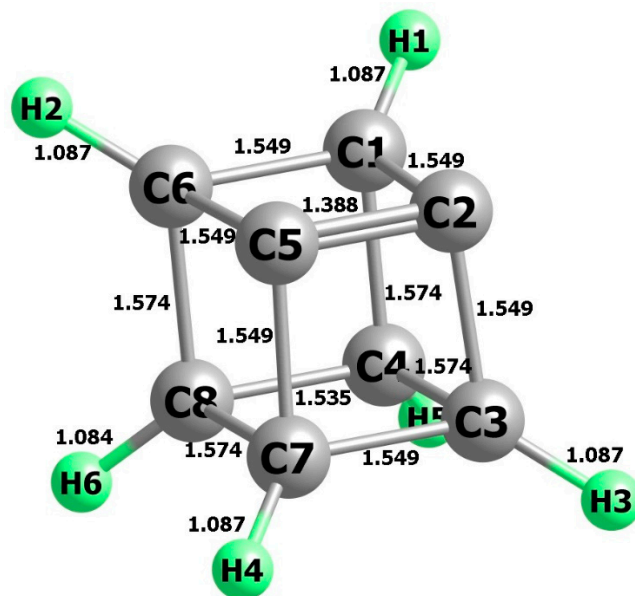

$C_8H_6$

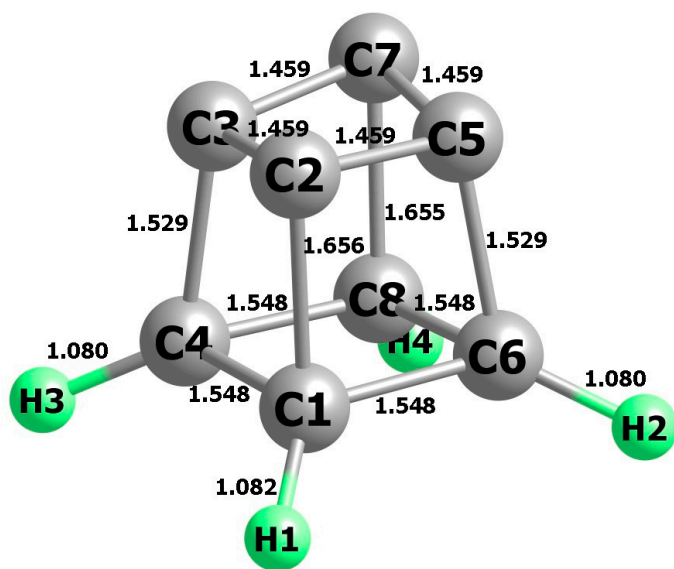

$C_8H_4$

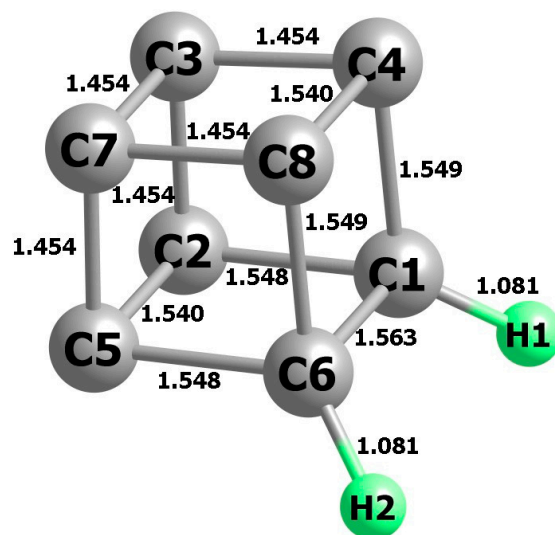

$C_8H_2$

The images of transient states (TS1, TS2, TS3 and TS4)  
of the cubane dehydrogenation reaction

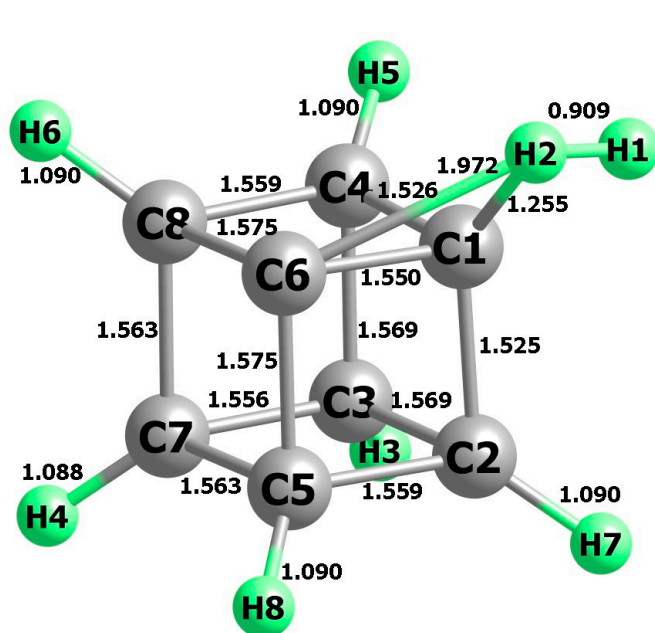

TS1

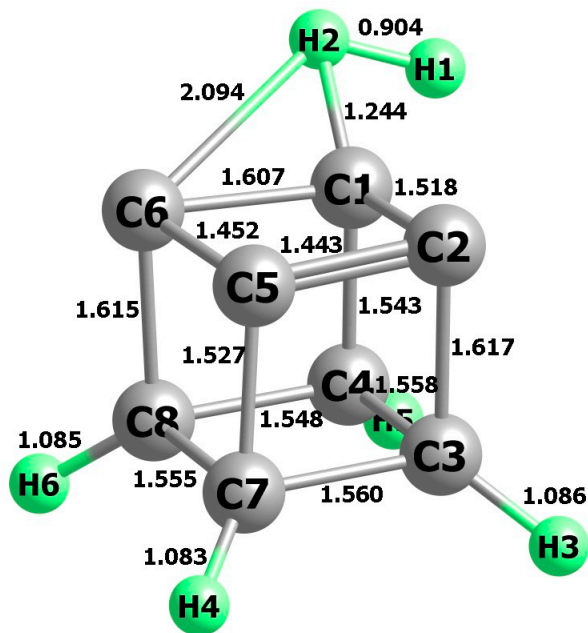

TS2

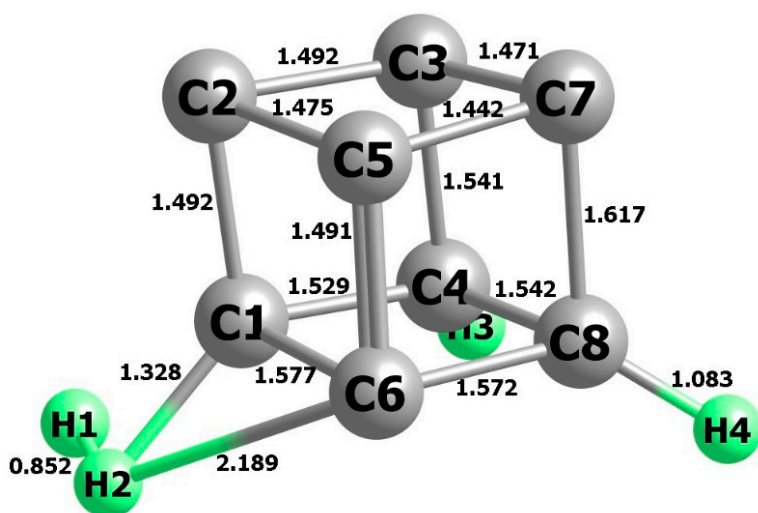

TS3

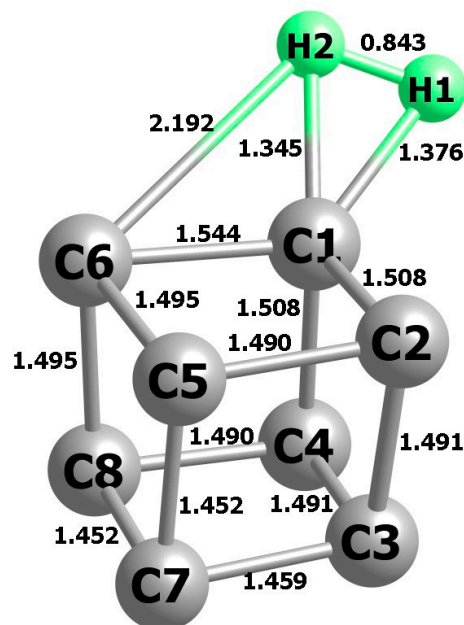

TS4
